# Supplementary material for: Long-Term Dynamic Changes of NMDA Receptors Following an Excitotoxic Challenge
Source: MDPI journal article supplement (doi:10.3390/cells11050911), 2022-03-07
Supplement: s1 [file s1]

**Supplementary table S1**

| <b>Gene</b>          | <b>nNOS (-)</b> | <b>nNOS (+)</b> | <b><i>P</i></b> |
|----------------------|-----------------|-----------------|-----------------|
| <b><i>Nos1</i></b>   | 1.07 ± 0.22     | 2.92 ± 0.25     | 0.0003          |
| <b><i>Grin1</i></b>  | 1.15 ± 0.25     | 0.16 ± 0.02     | 0.0272          |
| <b><i>Grin2a</i></b> | 1.05 ± 0.16     | 1.02 ± 0.42     | 0.31            |
| <b><i>Grin2b</i></b> | 1.21 ± 0.42     | 1.11 ± 0.29     | 0.42            |
| <b><i>Sod2</i></b>   | 1.03 ± 0.12     | 1.07 ± 0.24     | 0.42            |
| <b><i>Gpx1</i></b>   | 1.06 ± 0.17     | 0.73 ± 0.1      | 0.08            |
| <b><i>Bcl2</i></b>   | ND              | ND              |                 |
